# Supplementary material for: Bacterial Microbiota Profiling in Gastritis without Helicobacter pylori Infection or Non-Steroidal Anti-Inflammatory Drug Use
Source: PLoS One. 2009 Nov 24;4(11):e7985. doi: 10.1371/journal.pone.0007985 (PMC2776972; doi:10.1371/journal.pone.0007985)
Supplement: Table S3 — (0.02 MB XLS) [file pone.0007985.s008.xls]

## Sheet: Sheet2
	NCBI No.	Colony # in Sequencing of Streptococcus cultivation	Colony # in Sequencing of 16S rDNA cloning	Bik's study
Streptococcus anginosus	DQ232519	7	4	1
Streptococcus australis	AF184974	2	2	2
Streptococcus genomosp	AY278634	7	10	47
Streptococcus gordonii	AY281088	5	2	6
Streptococcus mitis	DQ303188	19	137	154
Streptococcus oralis	AY281080	8	14	0
Streptococcus parasanguinis	AY485605	20	11	8
Streptococcus pneumoniae	AY525788	6	21	0
Streptococcus salivarius	AF459433	18	22	33
Streptococcus sanguinis	AY691542	3	8	5
Streptococcus sp. clone	AY880051	5	6	0
Total	11 phylotypes	100	237	256
